# Supplementary material for: A comparative evaluation of calix[4]arene-1,3-crown-6 as a ligand for selected divalent cations of radiopharmaceutical interest
Source: Royal Society of Chemistry journal article supplement (doi:10.1039/c9ra07293d), 2019-01-01
Supplement: c9ra07293d1.pdf [file c9ra07293d1.pdf]

Supporting Information for

## A comparative evaluation of calix[4]arene-1,3-crown-6 as a ligand for selected divalent cations of radiopharmaceutical interest

David Bauer,<sup>a,b</sup> Markus Blumberg,<sup>a,b</sup> Martin Köckerling,<sup>c</sup> and Constantin Mamat<sup>a,b\*</sup>

- a) *Institut für Radiopharmazeutische Krebsforschung, Helmholtz-Zentrum Dresden-Rossendorf, Bautzner Landstraße 400, D-013228 Dresden, Germany*
- b) *Fakultät Chemie und Lebensmittelchemie, TU Dresden, D-01062 Dresden, Germany*
- c) *Institut für Chemie – Anorganische Festkörperchemie, Universität Rostock, Albert-Einstein-Straße 3a, D-18059 Rostock, Germany*

### Table of Contents

|                                                                                                                 |    |
|-----------------------------------------------------------------------------------------------------------------|----|
| NMR titration experiment of calix <b>1</b> with Sr <sup>2+</sup> .....                                          | S2 |
| NMR titration experiment of calix <b>1</b> with Ba <sup>2+</sup> .....                                          | S3 |
| NMR titration experiment of calix <b>1</b> with Pb <sup>2+</sup> .....                                          | S4 |
| NMR titration plots of calix <b>1</b> with Ba <sup>2+</sup> , Sr <sup>2+</sup> , and Pb <sup>2+</sup> .....     | S5 |
| UV/Vis titration experiment of calix <b>1</b> with Ba <sup>2+</sup> , Sr <sup>2+</sup> , Pb <sup>2+</sup> ..... | S6 |
| UV/Vis titration plots of calix <b>1</b> with Ba <sup>2+</sup> , Sr <sup>2+</sup> , and Pb <sup>2+</sup> .....  | S7 |
| Crystal data for ligand <b>1</b> .....                                                                          | S8 |

NMR titration experiment of calix **1** with Sr<sup>2+</sup>

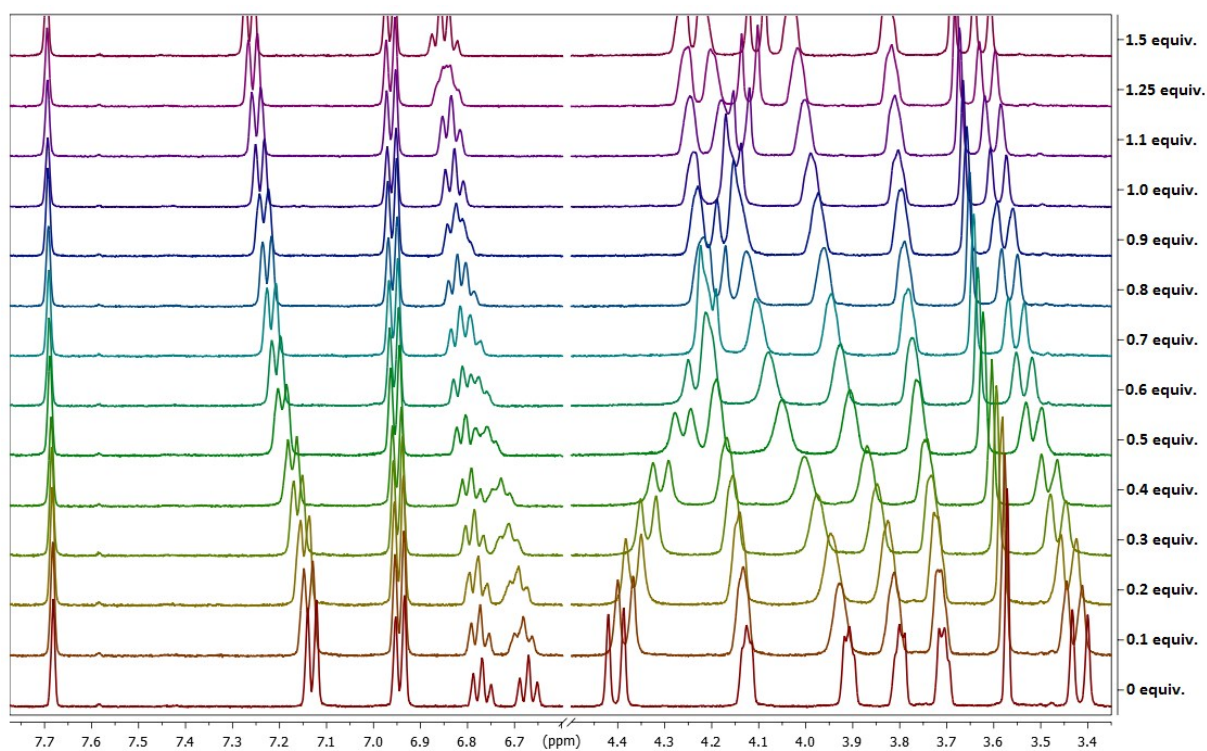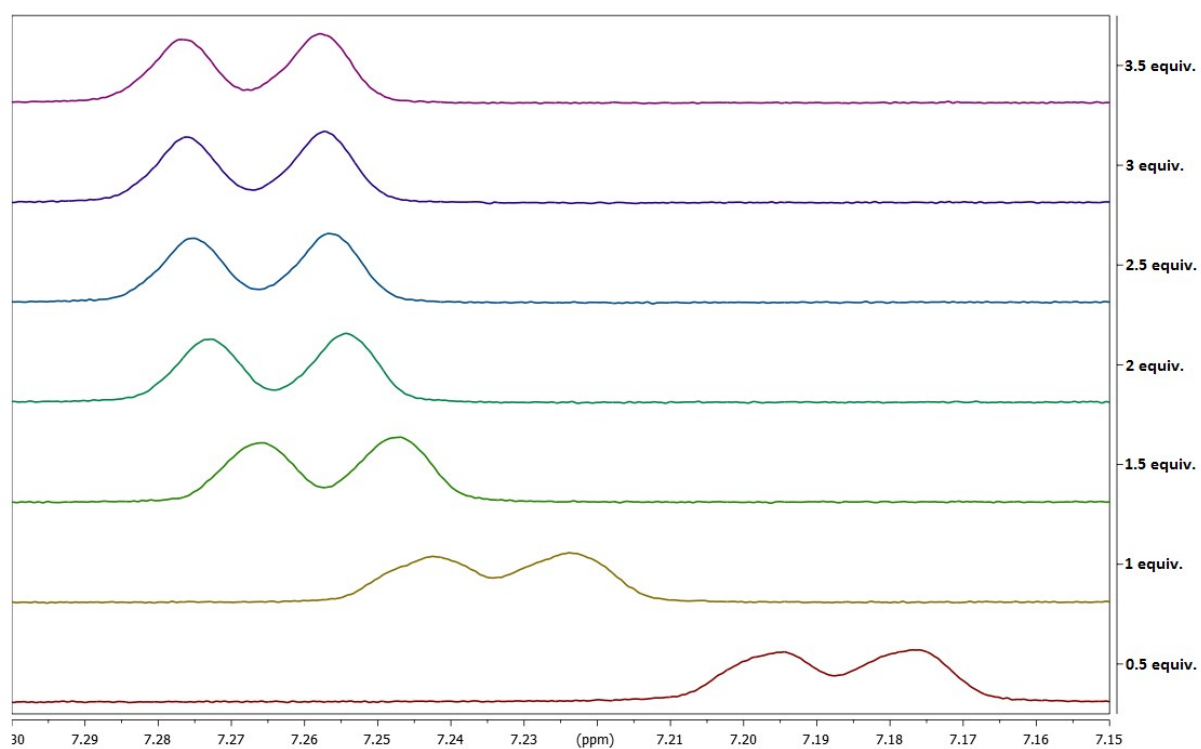

NMR titration experiment of calix **1** with Ba<sup>2+</sup>

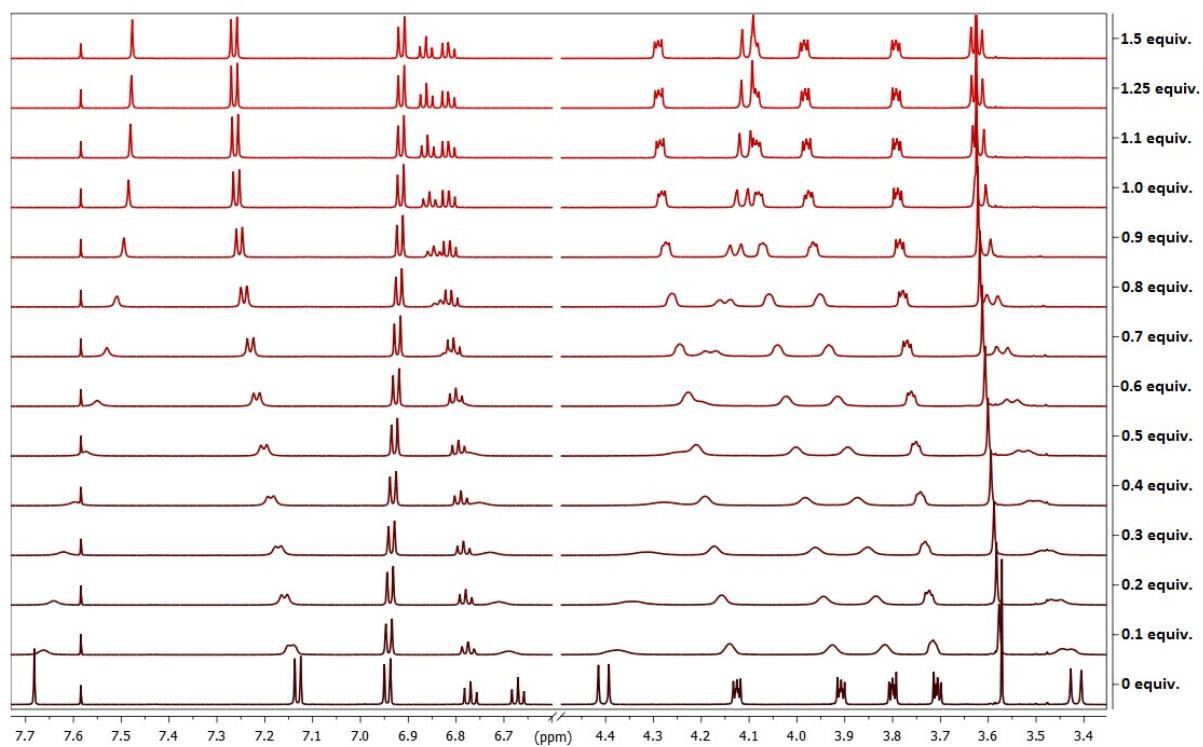

NMR titration experiment of calix **1** with Pb<sup>2+</sup>

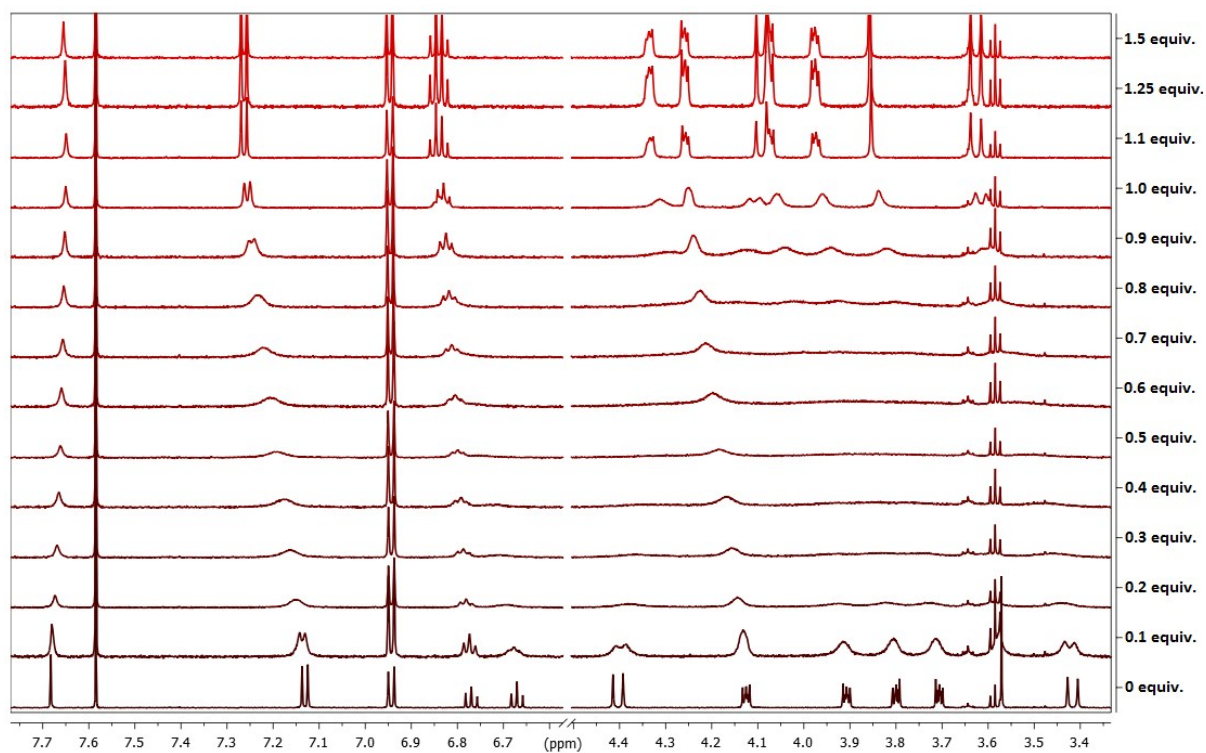

NMR titration plots of calix **1** with Ba<sup>2+</sup>, Sr<sup>2+</sup>, and Pb<sup>2+</sup>

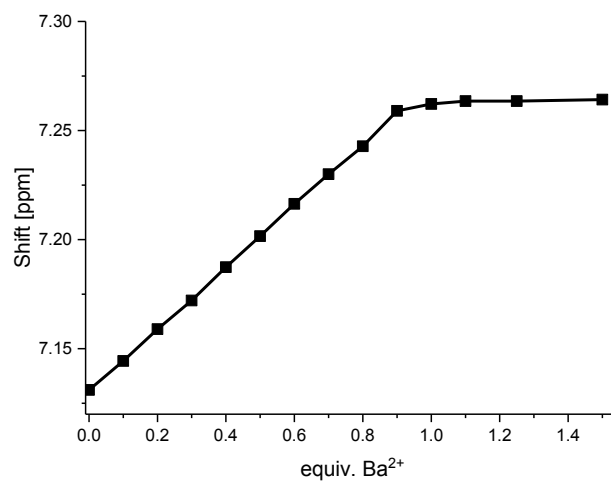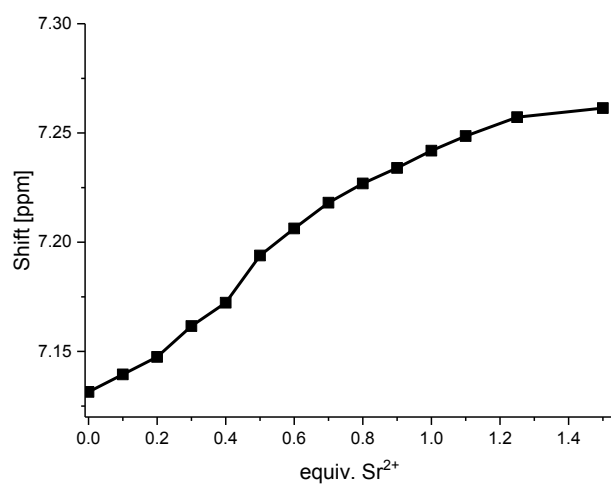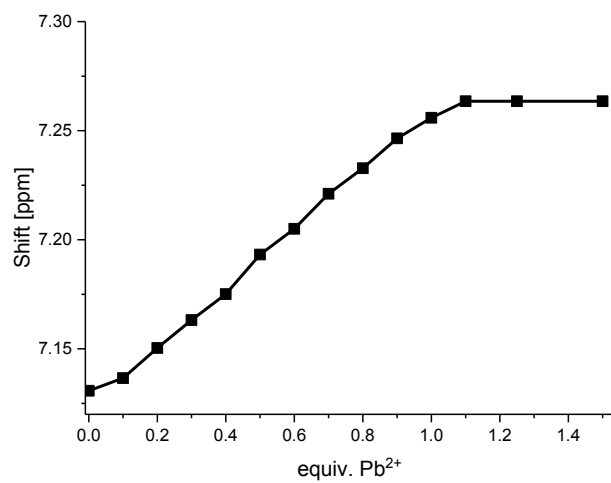

UV/Vis titration experiment of calix **1** with Ba<sup>2+</sup>, Sr<sup>2+</sup>, Pb<sup>2+</sup>

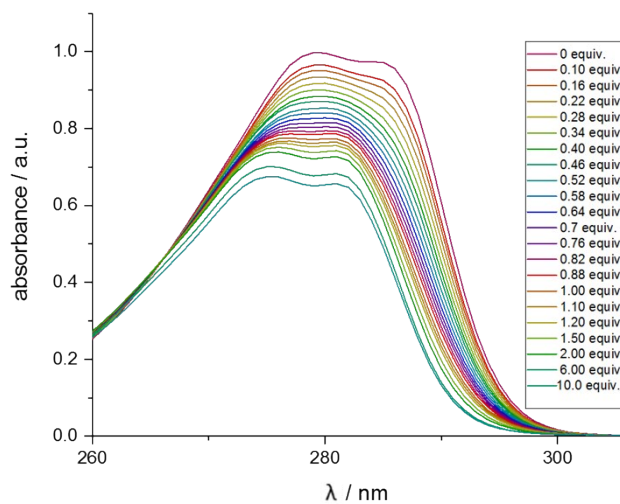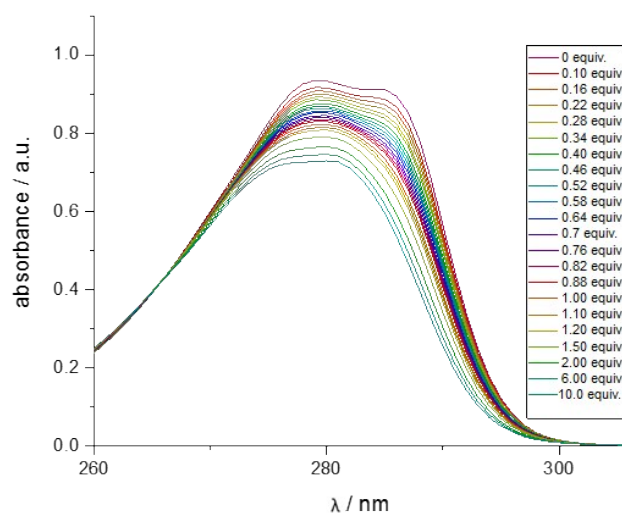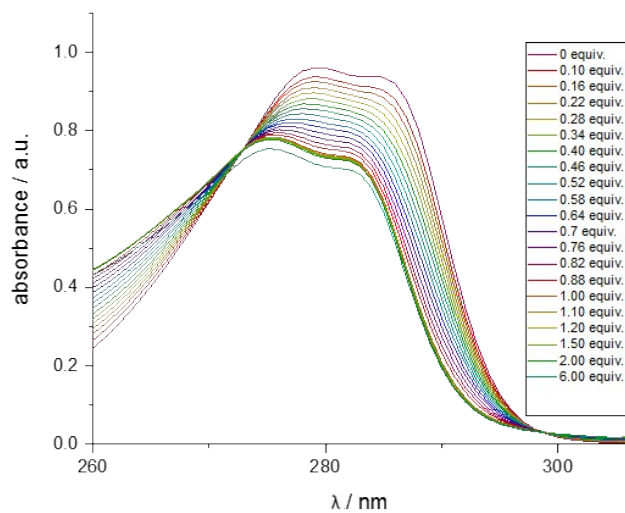

UV/Vis titration plots of calix ligand **1** with Ba<sup>2+</sup>, Sr<sup>2+</sup>, and Pb<sup>2+</sup>

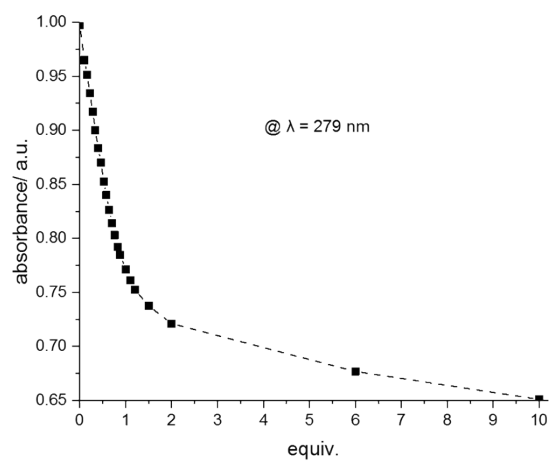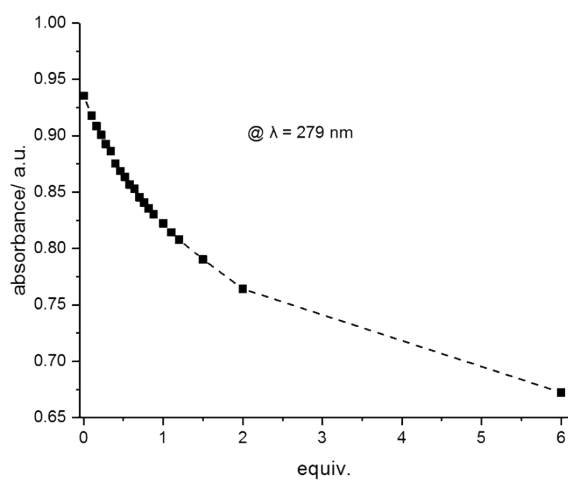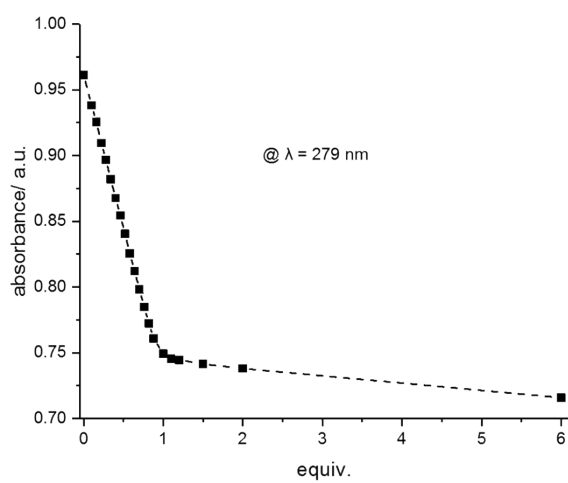

## Crystal data for ligand 1

|                                                                                                                                  |                                                                 |
|----------------------------------------------------------------------------------------------------------------------------------|-----------------------------------------------------------------|
| <b>Crystal data</b>                                                                                                              |                                                                 |
| <b>Chemical formula</b>                                                                                                          | C <sub>78</sub> H <sub>86</sub> Cl <sub>4</sub> O <sub>16</sub> |
| <b>Mr</b>                                                                                                                        | 1421.26                                                         |
| <b>Crystal system, space group</b>                                                                                               | Monoclinic, <i>P2/n</i>                                         |
| <b>Temperature (K)</b>                                                                                                           | 123                                                             |
| <b><i>a</i>, <i>b</i>, <i>c</i> (Å)</b>                                                                                          | 10.0307 (3), 14.0336 (5), 12.5626 (4)                           |
| <b><math>\beta</math> (°)</b>                                                                                                    | 100.105 (1)                                                     |
| <b><i>V</i> (Å<sup>3</sup>)</b>                                                                                                  | 1741.0 (1)                                                      |
| <b><i>Z</i></b>                                                                                                                  | 1                                                               |
| <b>Radiation type</b>                                                                                                            | Mo <i>K</i> $\alpha$                                            |
| <b><math>\mu</math> (mm<sup>-1</sup>)</b>                                                                                        | 0.24                                                            |
| <b>Crystal size (mm)</b>                                                                                                         | 0.15 × 0.13 × 0.13                                              |
| <b>Data collection</b>                                                                                                           |                                                                 |
| <b>Diffractometer</b>                                                                                                            | Bruker APEX-II CCD                                              |
| <b>Absorption correction</b>                                                                                                     | Multi-scan Bruker-Nonius SADABS                                 |
| <b>No. of measured, independent and observed [<i>I</i> &gt; 2<math>\sigma</math>(<i>I</i>)] reflections</b>                      | 22332, 6567, 5055                                               |
| <b><i>R</i><sub>int</sub></b>                                                                                                    | 0.035                                                           |
| <b>(<i>sin</i> <math>\theta</math>/<math>\lambda</math>)<sub>max</sub> (Å<sup>-1</sup>)</b>                                      | 0.770                                                           |
| <b>Refinement</b>                                                                                                                |                                                                 |
| <b><i>R</i>[<i>F</i><sup>2</sup> &gt; 2<math>\sigma</math>(<i>F</i><sup>2</sup>)], <i>wR</i>(<i>F</i><sup>2</sup>), <i>S</i></b> | 0.046, 0.125, 1.03                                              |
| <b>No. of reflections</b>                                                                                                        | 6567                                                            |
| <b>No. of parameters</b>                                                                                                         | 264                                                             |
| <b>H-atom treatment</b>                                                                                                          | H-atom parameters constrained                                   |
| <b><math>\Delta\rho_{\text{max}}</math>, <math>\Delta\rho_{\text{min}}</math> (e Å<sup>-3</sup>)</b>                             | 0.45, -0.36                                                     |

Computer programs: Bruker APEX2, Bruker SAINT, SHELXS2014 (Sheldrick, 2014), SHELXL2014 (Sheldrick, 2014), Bruker SHELXTL.
